# Supplementary material
Source: bioRxiv or medRxiv preprint supplement (https://medrxiv.org/content/medrxiv/early/2021/08/24/2021.08.16.21262073/DC1/embed/media-1.pdf)
Supplement: Supplementary file [file media-1.pdf]

# NHL INSTITUTIONAL REVIEW BOARD (NHLIRB)

## SMT N H L MUNICIPAL MEDICAL COLLEGE

Ellisbridge, Ahmedabad Gujarat (India): 380 006. Phone: 079-26576275, Fax: 079-26578451, Website: www.nhlmmc.edu.in

### Members:

#### Non Institutional

Dr B D Mankad  
Chairperson,  
Prof & Head  
Medicine, GCS  
Dr Asit Patel  
Member, Clinician  
Prof of Surgery, AMCMET  
Dr Nilay Suthar  
Member, Clinician  
Prof of Medicine, AMCMET  
Mr Narendra Shah  
Member Lay person  
Social Worker

#### Institutional

Dr Praik Patel  
I/c Institutional Head &  
Dean NHLMMC  
Dr Deepa Banker  
Prof of Pediatrics  
SVP  
Dr RajalThaker  
Prof of Obs&Gyn, SCLGH  
Dr Nadim Lil  
Prof of Orthopedics,  
SVP  
Dr Nilima Shah  
Assoc. Prof.,  
Dept.of Psychiatry  
SVP, NHLMMC  
Dr Shashwat Jani  
Assoc. Prof  
Dept of ObGy  
NHLMMC  
Dr Neeraj Mahajan  
Ass Prof  
Dept of Physiology  
NHLMMC  
Dr Devang Rana  
Asst Prof  
Dept of Pharmacology  
NHLMMC  
Dr Tanmay Mehta  
Asst Prof  
Dept of Microbiology  
NHLMMC  
Mr Amit Dave  
Legal Advisor  
AMC

#### Member Secretary:

Dr Falguni Majmudar  
Member Secretary  
Asst Prof  
Dept of Pharmacology  
NHLMMC

To  
Dr. Janak Khambholja,  
Professor,  
Department of General Medicine,  
SVPIMSR, NHLMMC

Date: 11/09/2020

Ref: " Comparative study of efficacy of various adjunct treatment options in adult COVID-19 illness: A Case Control Study "

Dear Dr. Janak Khambholja,  
At the meeting held on 9<sup>th</sup> September, 2020, the Institutional Review Board, Smt. NHL Municipal Medical College [NHLIRB] reviewed and discussed your application for approval of your research study titled, " Comparative study of efficacy of various adjunct treatment options in adult COVID-19 illness: A Case Control Study" along with your co investigators Dr. Nehal Shah and Dr. Nilay Suthar

The following documents were reviewed during the meeting:  
**Study Protocol including case record form**

During the meeting, the members of the NHLIRB reviewed the submitted documents and discussed the study in detail. The investigators were able to answer the queries raised by the committee satisfactorily.

A sub study "Characteristics of severity in COVID-19 Pneumonia: a retrospective Observational Study" from the data collected there was also proposed by your study team.

The committee decided to collectively approve the conduct of both the above studies in the presented form.

The following members of the committee were present/voted in the meeting and were involved in the approval process:

Dr B D Mankad, Chairperson, Prof & Head, Dept. of Medicine, GCS  
Dr Nadim Lil, Prof of Orthopedics, SVP, NHLMMC  
Dr Nilima Shah, Assoc. Prof., Dept.of Psychiatry, SVP, NHLMMC  
Dr Shashwat Jani, Assoc. Prof., Dept of ObGy.,NHLMMC  
Dr Falguni Majmudar, Member Secretary, Asst Prof., Dept of Pharmacology, NHLMMC  
Dr Tanmay Mehta, Asst Prof., Dept of Microbiology, NHLMMC  
Dr Devang Rana, Member, Asst. Prof., Dept of Pharmacology, NHLMMC  
Mr Narendra Shah, Member, Social Worker  
Mr Amit Dave, Legal Advisor, AMC

#### Please Note:

You are requested to update NHLIRB about the progress of the study. You are directed not to violate the protocol and inform NHLIRB about protocol deviation immediately. You are also directed to intimate NHLIRB any change/ amendment in Protocol/Informed consent/Questionnaire and submit FINAL REPORT of the study at the completion of the study.

  
Dr Falguni Majmudar  
Member Secretary

Date: 11/09/2020
